# Supplementary figures and images for: Trends in the Diagnosis and Treatment of Patients with Medullary Thyroid Carcinoma in Korea
Source: PubMed Central journal article supplement — Endocrinol Metab (Seoul). 2020 Nov 20;35(4):811–9. doi: 10.3803/EnM.2020.709 (PMC7803611; doi:10.3803/enm.2020.709), 2020-11-20

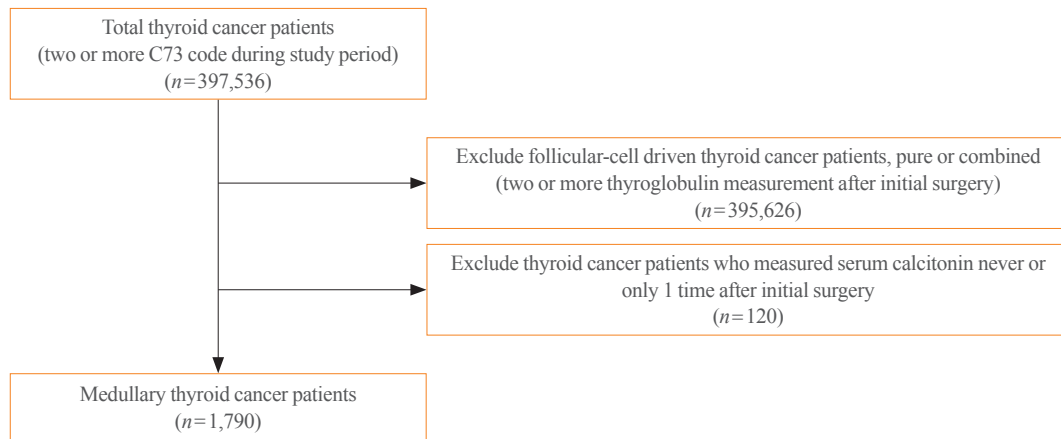

**Supplemental Fig. S1.** Flow-chart of patient selection.

Supplement: enm-2020-709-suppl.pdf [file enm-2020-709-suppl.pdf]
